**CORRECTION**

# Correction: Mice humanised for the EGF receptor display hypomorphic phenotypes in skin, bone and heart

Maria Sibilgia, Bettina Wagner, Astrid Hoebertz, Candace Elliott, Silvia Marino, Wolfram Jochum and Erwin F. Wagner

There was an error published in Development 130, 4515-4525.

In Fig. 6, owing to an error in figure assembly during preparation of the proofs, the incorrect image (a duplication of panel D) was displayed in panel G. The corrected figure appears below.

We apologise to the authors and readers for this mistake.

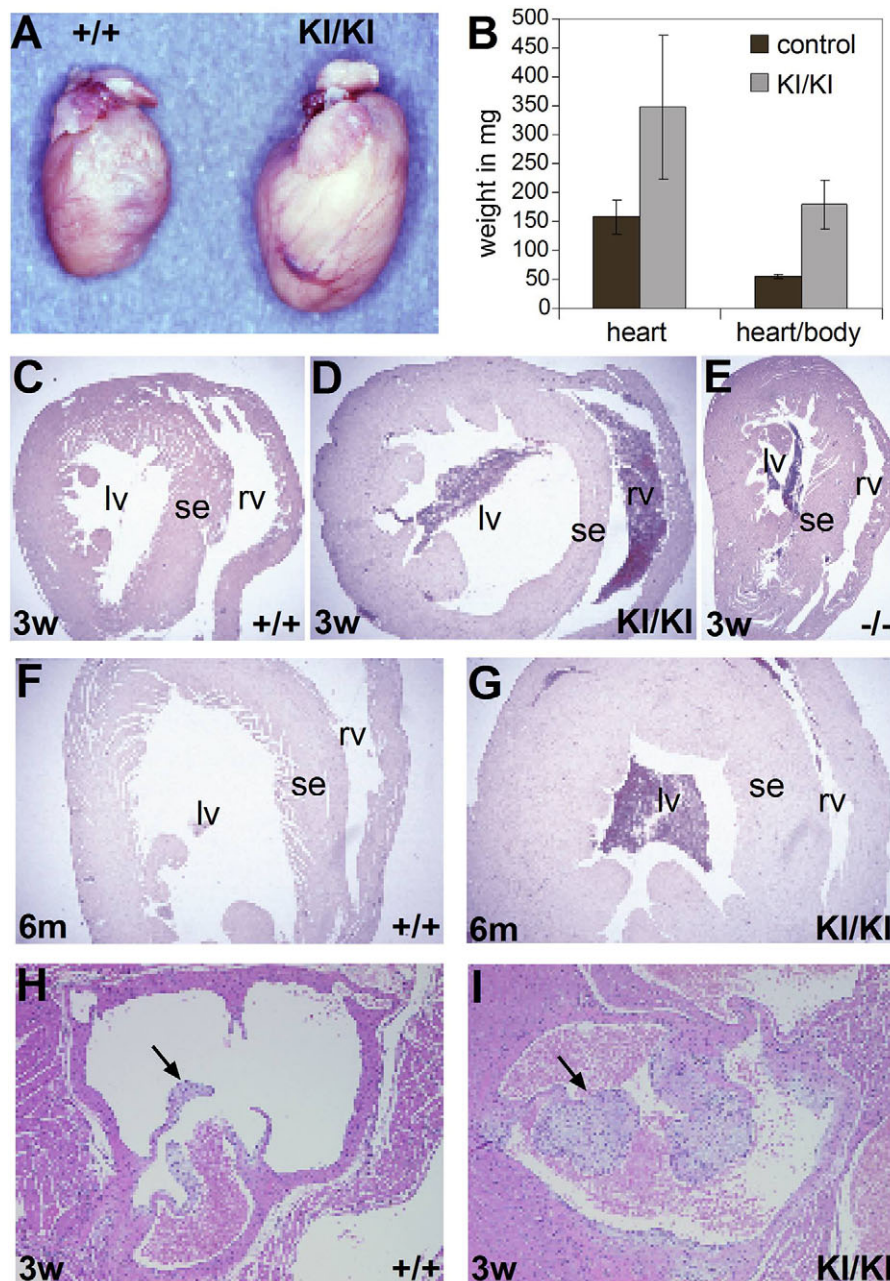

Source: https://cob.silverchair.com/dev/article-pdf/143/24/4755/1844581/dev146209.pdf
